# Supplementary material for: Highly luminescent water-soluble CdTe nanowires as fluorescent probe to detect copper(ii)
Source: Royal Society of Chemistry journal article supplement (doi:10.1039/b502978c), 2005-01-01
Supplement: b502978c.pdf [file b502978c.pdf]

## Supplementary data

### Instruments

TEM images were recorded by a H-800 electron microscope (HITACHI, Japan) operating at 200 kV. Samples for TEM were prepared by casting one drop of the CdTe sample solution onto a standard formvar film on copper grid (230 meshes).

HRTEM image was recorded by a JEOL-2010F high-resolution transmission electron microscope.

Power X-ray diffraction (XRD) measurement was performed on a Rigaku D/Max-rB X-ray Diffractometer with Cu K $\alpha$  radiation (1.5406 Å).

Energy disperse spectroscopy (EDS) data were obtained from GENESIS X-ray Energy disperse spectroscope (EDAX Inc., America).

Luminescence spectra data were obtained from Cary Eclipse Fluorescence Spectrophotometer (Varian, Australia). The excitation and emission slit width were both 5 nm. The detector voltage was fixed at 600 V.

### Figures

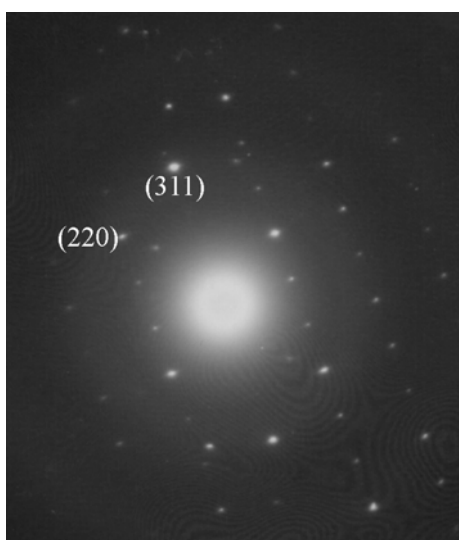

**Fig. S1** SAED pattern of CdTe NWs showing that the nanowires have a cubic CdTe crystal structure.

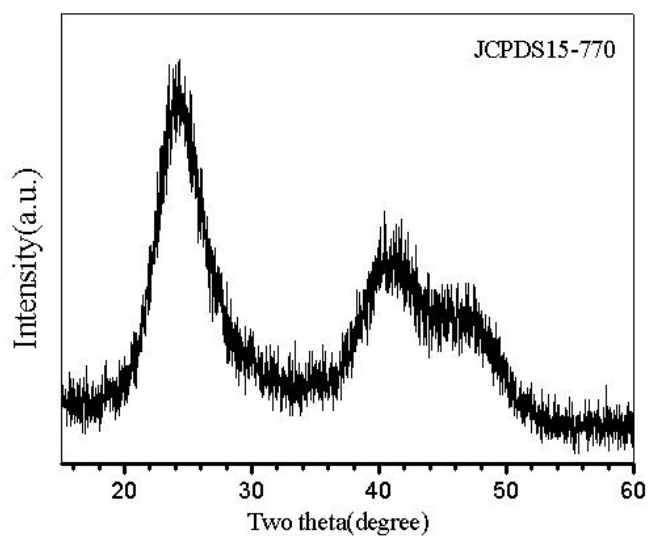

**Fig. S2** XRD pattern of CdTe NWs showing that the nanowires have a cubic CdTe crystal structure.

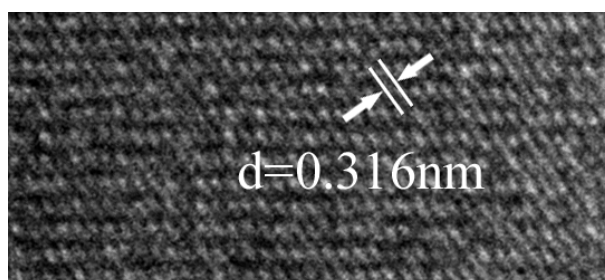

**Fig. S3** HRTEM image of CdTe NWs showing that the interplanar spacing was about 0.316nm, which corresponded to the (200) plane of the cubic CdTe crystallite.

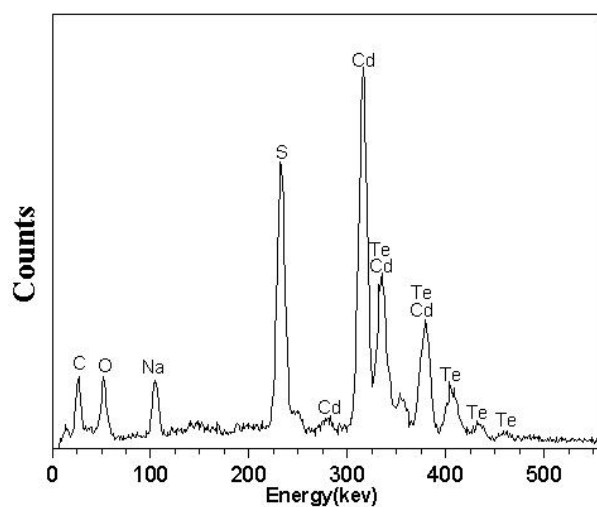

**Fig. S4** EDS pattern of CdTe NWs showing that the major elements of the nanowires were Cd, Te and S.

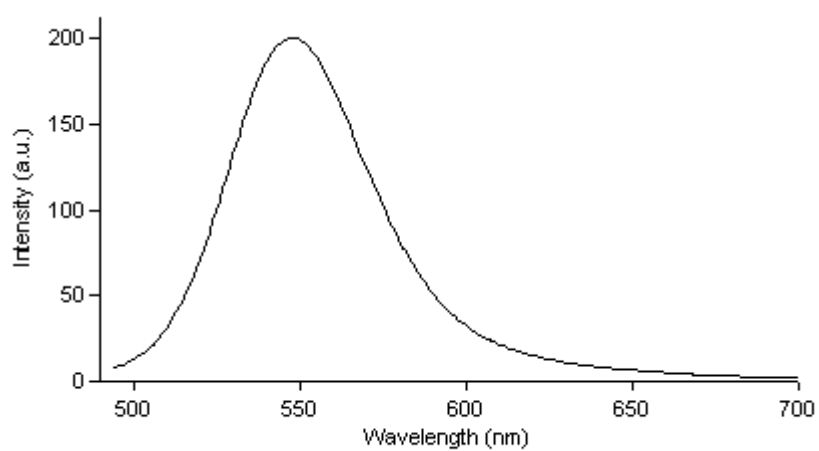

**Fig. S5** PL spectrum of the CdTe QDs stock solution with the excitation wavelength of 400nm.

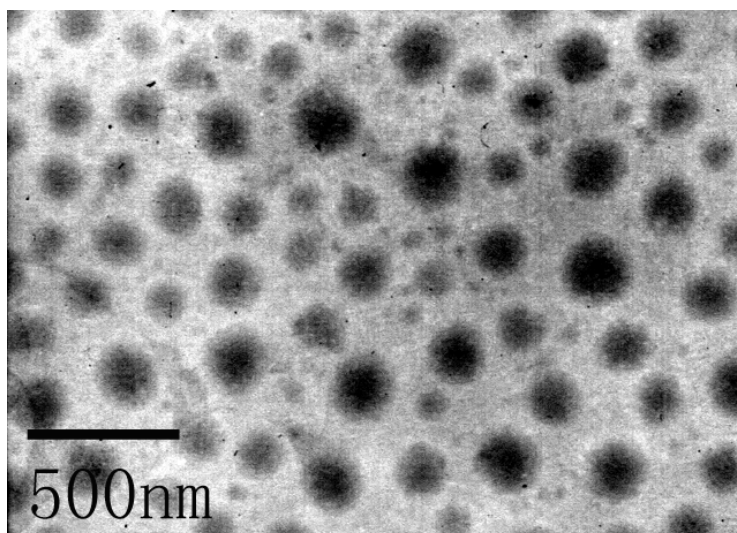

**Fig. S6** TEM image of the CdTe QDs.
